# Supplementary material for: Gelatin Nanoparticles for Targeted Dual Drug Release out of Alginate-di-Aldehyde-Gelatin Gels
Source: MDPI journal article supplement (doi:10.3390/gels8060365), 2022-06-08
Supplement: s1 [file s1]

Article

# Gelatin Nanoparticles for Targeted Dual Drug Release out of Alginate-di-Aldehyde-Gelatin Gels

Sophie Schrade <sup>1,2</sup>, Lucas Ritschl <sup>1</sup>, Regine Süß <sup>2</sup>, Pia Schilling <sup>1</sup> and Michael Seidenstuecker <sup>1,\*</sup>

<sup>1</sup> G.E.R.N. Center of Tissue Replacement, Regeneration & Neogenesis, Department of Orthopedics and Trauma Surgery, Medical Center - Albert-Ludwigs-University of Freiburg, Faculty of Medicine, Albert-Ludwigs-University of Freiburg, Hugstetter Straße 55, 79106 Freiburg, Germany; sophie.schrade@uniklinik-freiburg.de (S.S.); lucas.ritschl@uniklinik-freiburg.de (L.R.); pia.schilling@uniklinik-freiburg.de (P.S.)

<sup>2</sup> Institute of Pharmaceutical Sciences, Albert-Ludwigs-University of Freiburg, Sonnenstr. 5, 79104 Freiburg, Germany; regine.suess@pharmazie.uni-freiburg.de

\* Correspondence: michael.seidenstuecker@uniklinik-freiburg.de

## Supplementary Materials

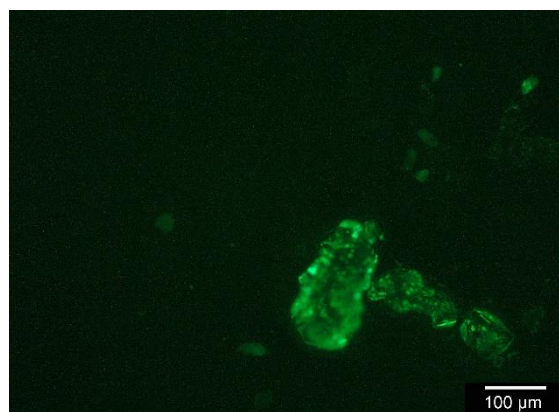

Figure S1. Image (Live Dead staining) of agglomerated GNP-BMP2 with MG-63 cells.

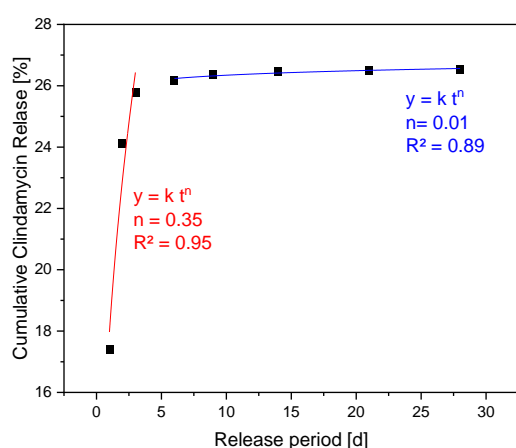

(a)

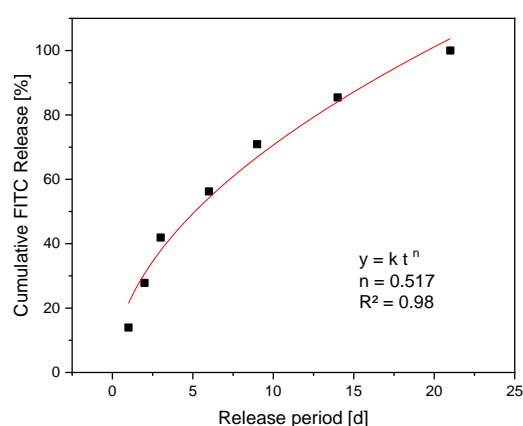

(b)

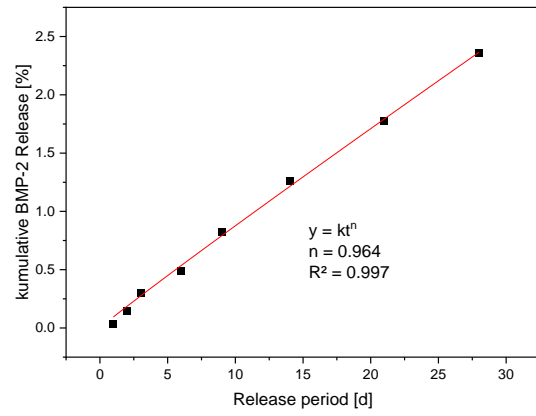

(c)

**Figure S2.** Cumulative releases, fit according to Ritger et al. [28]; (a) Clindamycin; (b) Conjugated FITC-protein A, with a diffusion coefficient  $n=0.5$  for Fickian' diffusion; (c) BMP-2 in relation to the BMP-2 amount used. According to previous published work [44], the fitting for the CLI release was split into a beginning part ( $n_B$ ) and final part ( $n_F$ ), both with a normal diffusion ( $n_B = 0.35$  and  $n_F = 0.01$ ).
